# Supplementary material
Source: publisher figshare collection journal article supplement (https://acs.figshare.com/ndownloader/files/4817221)
Supplement: Supplementary file 1 [file 4817221]

Compound_ID	SMILES
1	O=C1C=C(CN(CC)C2=CC=CC=C2)N=C3SC(CCCC)=NN31
2	CC(S1)=NN2C1=NC(CN(CC)C3=CC=CC=C3)=CC2=O
3	CC(S1)=NN2C1=NC(CN(CC)C3=CC=C(F)C=C3)=CC2=O
4	CC(S1)=CN2C1=NC(CN(CC)C3=CC=C(F)C=C3)=CC2=O
5	CC(S1)=C(C2=CN=CC=C2)N3C1=NC(CN(CC)C4=CC=C(F)C=C4)=CC3=O
6	CC(S1)=C(C2=CN=CN=C2)N3C1=NC(CN(CC)C4=CC=C(F)C=C4)=CC3=O
7	CC(S1)=C(N2CCOCC2)N3C1=NC(CN(CC)C4=CC=C(F)C=C4)=CC3=O
8	CC(S1)=C(C#N)N2C1=NC(CN(CC)C3=CC=C(F)C=C3)=CC2=O
9	CC(S1)=C(CO)N2C1=NC(CN(CC)C3=CC=C(F)C=C3)=CC2=O
10	CC(S1)=C(C(C)O)N2C1=NC(CN(CC)C3=CC=C(F)C=C3)=CC2=O
11	CC(S1)=C(C(C)(C)O)N2C1=NC(CN(CC)C3=CC=C(F)C=C3)=CC2=O
12	CC(S1)=C(CCO)N2C1=NC(CN(CC)C3=CC=C(F)C=C3)=CC2=O
13	CC(S1)=C(CCCO)N2C1=NC(CN(CC)C3=CC=C(F)C=C3)=CC2=O
14	CC(S1)=C(C(C)C)N2C1=NC(CN(CC)C3=CC=C(F)C=C3)=CC2=O
15	CC(S1)=C(C2CCC2)N3C1=NC(CN(CC)C4=CC=C(F)C=C4)=CC3=O
16	CC(S1)=C(C2CC2)N3C1=NC(CN(CC)C4=CC=C(F)C=C4)=CC3=O
17	CC(S1)=C(C2CC2)N3C1=NC(CN(CC)C4=CC=C(F)C=C4)=CC3=O
18	CC(S1)=C(C(C)=O)N2C1=NC(CN(CC)C3=CC=C(F)C=C3)=CC2=O
19	CC(S1)=C(C(NC)=O)N2C1=NC(CN(CC)C3=CC=C(F)C=C3)=CC2=O
20	CC(S1)=C(C(NCC)=O)N2C1=NC(CN(CC)C3=CC=C(F)C=C3)=CC2=O
21	CC(S1)=C(C(NCC)=O)N2C1=NC(CN(CCC)C3=CC=C(F)C=C3)=CC2=O
22	CC(S1)=C(C(NCC)=O)N2C1=NC(CN(C)C3=CC=C(F)C=C3)=CC2=O
23	CC(S1)=C(C(NCC)=O)N2C1=NC(CNC3=CC=C(F)C=C3)=CC2=O
24	CC(S1)=C(C(NCC)=O)N2C1=NC(CN(CC)C3=CC=C(F)C=N3)=CC2=O
25	CC(S1)=C(C(NCC)=O)N2C1=NC(COC3=CC=C(F)C=C3)=CC2=O
26	CC(S1)=C(C(NCC)=O)N2C1=NC(CC3=CC=CC(C#N)=C3)=CC2=O
27	CC(S1)=C(C(NCC)=O)N2C1=NC(CC3=CC=CC(C(F)(F)F)=C3)=CC2=O
28	CC(S1)=C(C(NCC)=O)N2C1=NC(CC3=CC=CC(C#N)=C3F)=CC2=O
29	CC(S1)=C(C(NCC)=O)N2C1=NC(CC3=CC=CC(C(F)(F)F)=C3F)=CC2=O
30	CC(S1)=C(C(NCC)=O)N2C1=NC(CC3=C(Cl)C=CC(C#N)=C3)=CC2=O
31	CC(S1)=C(C(NCC)=O)N2C1=NC(CC3=C(C4CC4)C=CC(C#N)=C3)=CC2=O
32	CC(S1)=C(C(NCC)=O)N2C1=NC(C(C)C3=CC=CC(C(F)(F)F)=C3F)=CC2=O
33	CC(S1)=C(C(NCC)=O)N2C1=NC(CN3C=CC(C(F)(F)F)=N3)=CC2=O
34	CC(S1)=C(C(NCC)=O)N2C1=NC(CN3C(C)=CC(C(F)(F)F)=N3)=CC2=O
35	CC(S1)=C(C(NCC)=O)N2C1=NC(CN3C(Cl)=CC(C(F)(F)F)=N3)=CC2=O
36	CC(S1)=C(C(NCC)=O)N2C1=NC(CN3C(C4CC4)=CC(C(F)(F)F)=N3)=CC2=O
37	CC(S1)=C(C(NCC)=O)N2C1=NC(CN3C(OCC)=CC(C(F)(F)F)=N3)=CC2=O
38	CC(S1)=C(C(NCC)=O)N2C1=NC(CN3C(OCC(C)C)=CC(C(F)(F)F)=N3)=CC2=O
39	CC(S1)=C([C@H](C2)[C@@H]2CO)N3C1=NC(CN(C4=CC=C(F)C=C4)CC)=CC3=O
40	CC(S1)=C([C@H](C2)[C@@H]2CO)N3C1=NC(COC4=CC=C(F)C=C4)=CC3=O
41	CC(S1)=C(C(C2)([H])C2([H])CO)N3C1=NC(CC4=CC=CC(C#N)=C4F)=CC3=O
42	CC(S1)=C(C(C2)([H])C2([H])CO)N3C1=NC(CC4=CC=CC(C(F)(F)F)=C4F)=CC3=O
43	CC(S1)=C([C@H](C2)[C@@H]2CO)N3C1=NC(CN4C(Cl)=CC(C(F)(F)F)=N4)=CC3=O
44	O=C1C=C(CN2C(Cl)=CC(C(F)(F)F)=N2)N=C3SC(C(F)(F)F)=C([C@H](C4)[C@@H]4CO)N31
45	CC(S1)=C([C@H](C2)[C@@H]2C#N)N3C1=NC(CN4C(Cl)=CC(C(F)(F)F)=N4)=CC3=O
46	O=C1C=C(CN2C(Cl)=CC(C(F)(F)F)=N2)N=C3SC(C(F)(F)F)=C([C@H](C4)[C@@H]4C#N)N31
